# Supplementary material for: Following Natural Autoantibodies: Further Immunoserological Evidence Regarding Their Silent Plasticity and Engagement in Immune Activation
Source: MDPI journal article supplement (doi:10.3390/ijms241914961), 2023-10-06
Supplement: s1 [file s1]

## Supplementary Materials

**Supplementary Table S1.** (for Figure 1). Sample numbers used for MMR seropositivity ratio (%) calculation. Samples with extrapolated results (value  $\leq$  limit of quantification or value  $\geq$  upper limit of detection) were excluded from the statistical evaluation, hence the varying sample numbers per compound of interest.

| Age Group | Total Number of Samples/Age Group | Number of Seropositive Samples/Antigen |       |         |
|-----------|-----------------------------------|----------------------------------------|-------|---------|
|           |                                   | Measles                                | Mumps | Rubella |
| 20-30 y   | 143                               | 126                                    | 123   | 132     |
| 31-40 y   | 279                               | 211                                    | 235   | 242     |
| 41-50 y   | 359                               | 278                                    | 285   | 299     |
| 51-60 y   | 307                               | 225                                    | 238   | 265     |
| 61-70 y   | 291                               | 257                                    | 248   | 273     |
| 71-80 y   | 253                               | 236                                    | 214   | 226     |
| 81-90 y   | 107                               | 98                                     | 95    | 96      |
| TOTAL     | 1739                              | 1431                                   | 1438  | 1533    |

**Supplementary Table 2.** (for Figure 3) Sample numbers used for anti-SARS-CoV-2 seropositivity ratio (%) calculation, only from vaccinated individuals. From the serum bank, a representative number of samples for each age group was selected to be measured with the commercial (Eruoimmun Quantivac) ELISA assay as well as with our in-house anti-CS assay.

| Age Group | Number of Samples | Number of Seropositive Samples                    | Seropositivity Ratio %                            | Number of Seropositive Samples                    | Seropositivity Ratio %                            |
|-----------|-------------------|---------------------------------------------------|---------------------------------------------------|---------------------------------------------------|---------------------------------------------------|
|           |                   | Cut-Off of the Equivocal Range:<br>$\geq 8$ RU/mL | Cut-Off of the Equivocal Range:<br>$\geq 8$ RU/mL | Cut-Off of the Positive Range:<br>$\geq 11$ RU/mL | Cut-Off of the Positive Range:<br>$\geq 11$ RU/mL |
| 21-30 y   | 21                | 21                                                | 100.00                                            | 21                                                | 100.00                                            |
| 31-40 y   | 30                | 30                                                | 100.00                                            | 30                                                | 100.00                                            |
| 41-50 y   | 26                | 24                                                | 92.31                                             | 24                                                | 92.31                                             |
| 51-60 y   | 50                | 49                                                | 98.00                                             | 48                                                | 96.00                                             |
| 61-70 y   | 50                | 48                                                | 96.00                                             | 46                                                | 92.00                                             |
| 71-80 y   | 30                | 24                                                | 80.00                                             | 24                                                | 80.00                                             |
| 81-90 y   | 22                | 22                                                | 100.00                                            | 22                                                | 100.00                                            |
| TOTAL     | 237               | 218                                               | 91.98                                             | 215                                               | 90.72                                             |
